# Supplementary material for: Probiotics Enhance Bone Growth and Rescue BMP Inhibition: New Transgenic Zebrafish Lines to Study Bone Health
Source: MDPI journal article supplement (doi:10.3390/ijms23094748), 2022-04-26

# Probiotics enhance bone growth and rescue BMP inhibition: new transgenic zebrafish lines to study bone health

Jerry Maria Sojan<sup>1+</sup>, Ratish Raman<sup>2+</sup>, Marc Muller<sup>2\*</sup>, Oliana Carnevali<sup>1</sup>, Jörg Renn<sup>2</sup>

**Supplementary Figure S1:** Representative images of **(a)** lateral and **(b)** ventral views of zebrafish larvae head showing how the pixel intensity was measured in both views. Red indicate the area measured and yellow denote the eye area subtracted. Bony structures are in white against grey background.

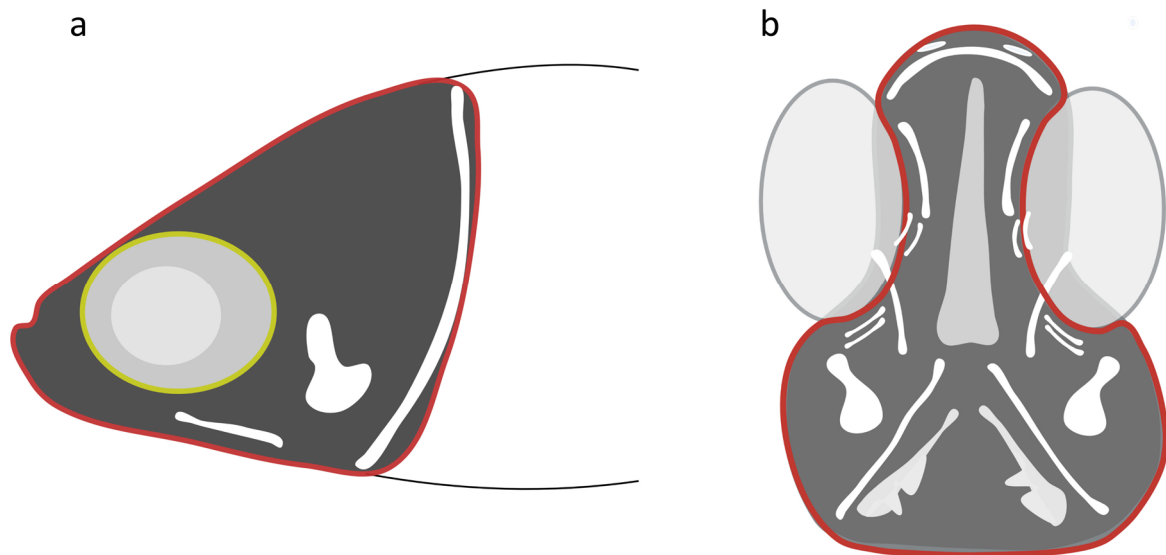

Supplement: s1 [file s1]
